# Supplementary material
Source: PubMed Central journal article supplement (PMC3838459)

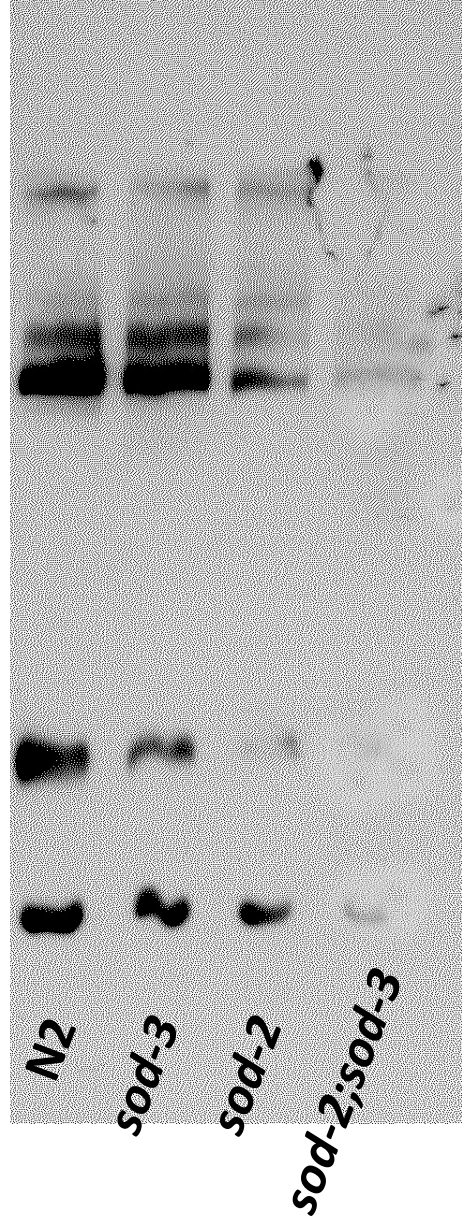

## CI-IGA

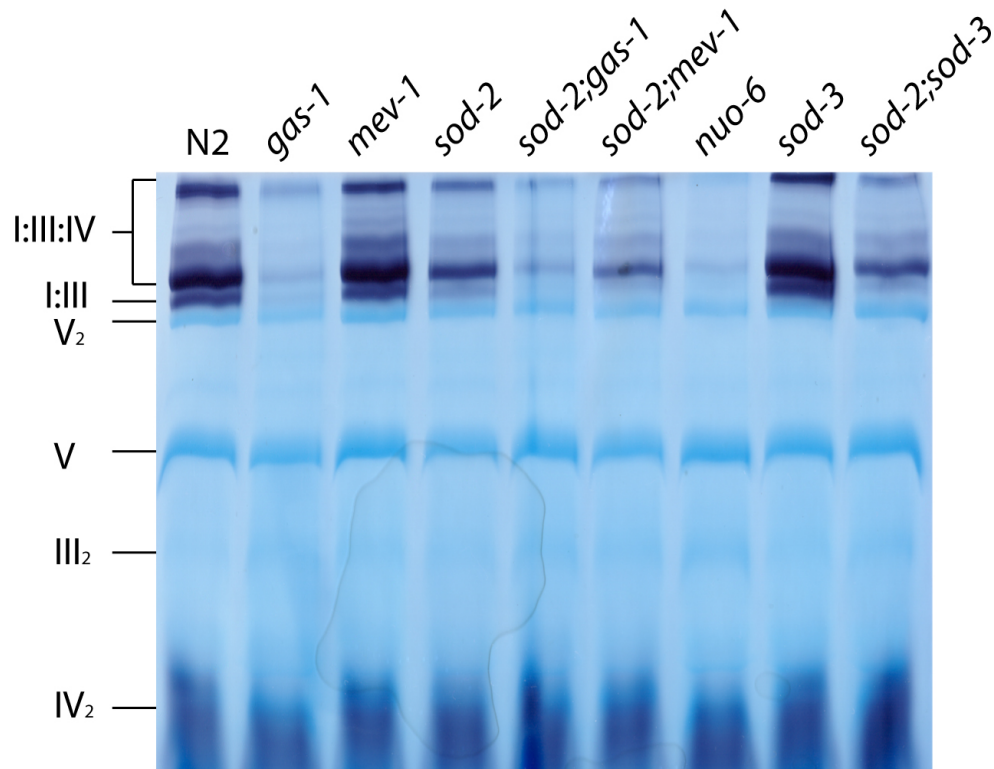

## Native-Western-HNE

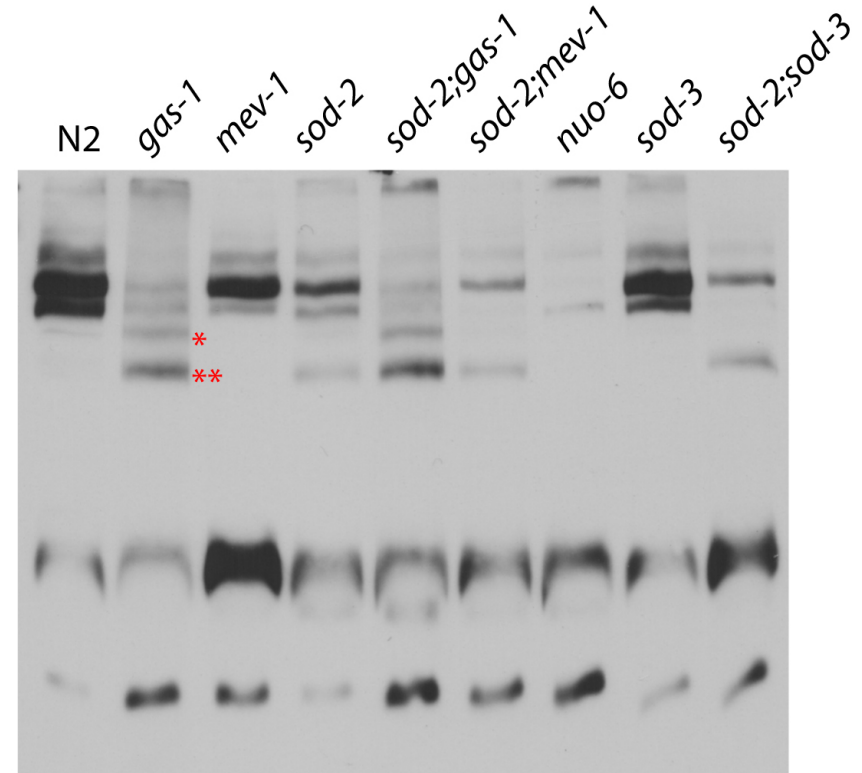

**Note:** Bands labeled \* and \*\* seen in *gas-1*, *sod-2*, *sod-2;gas-1*, *sod-2;mev-1* and *sod-2;sod-3* resemble ISP-A and ISP-B, respectively (described in Suthammarak et al., 2010)

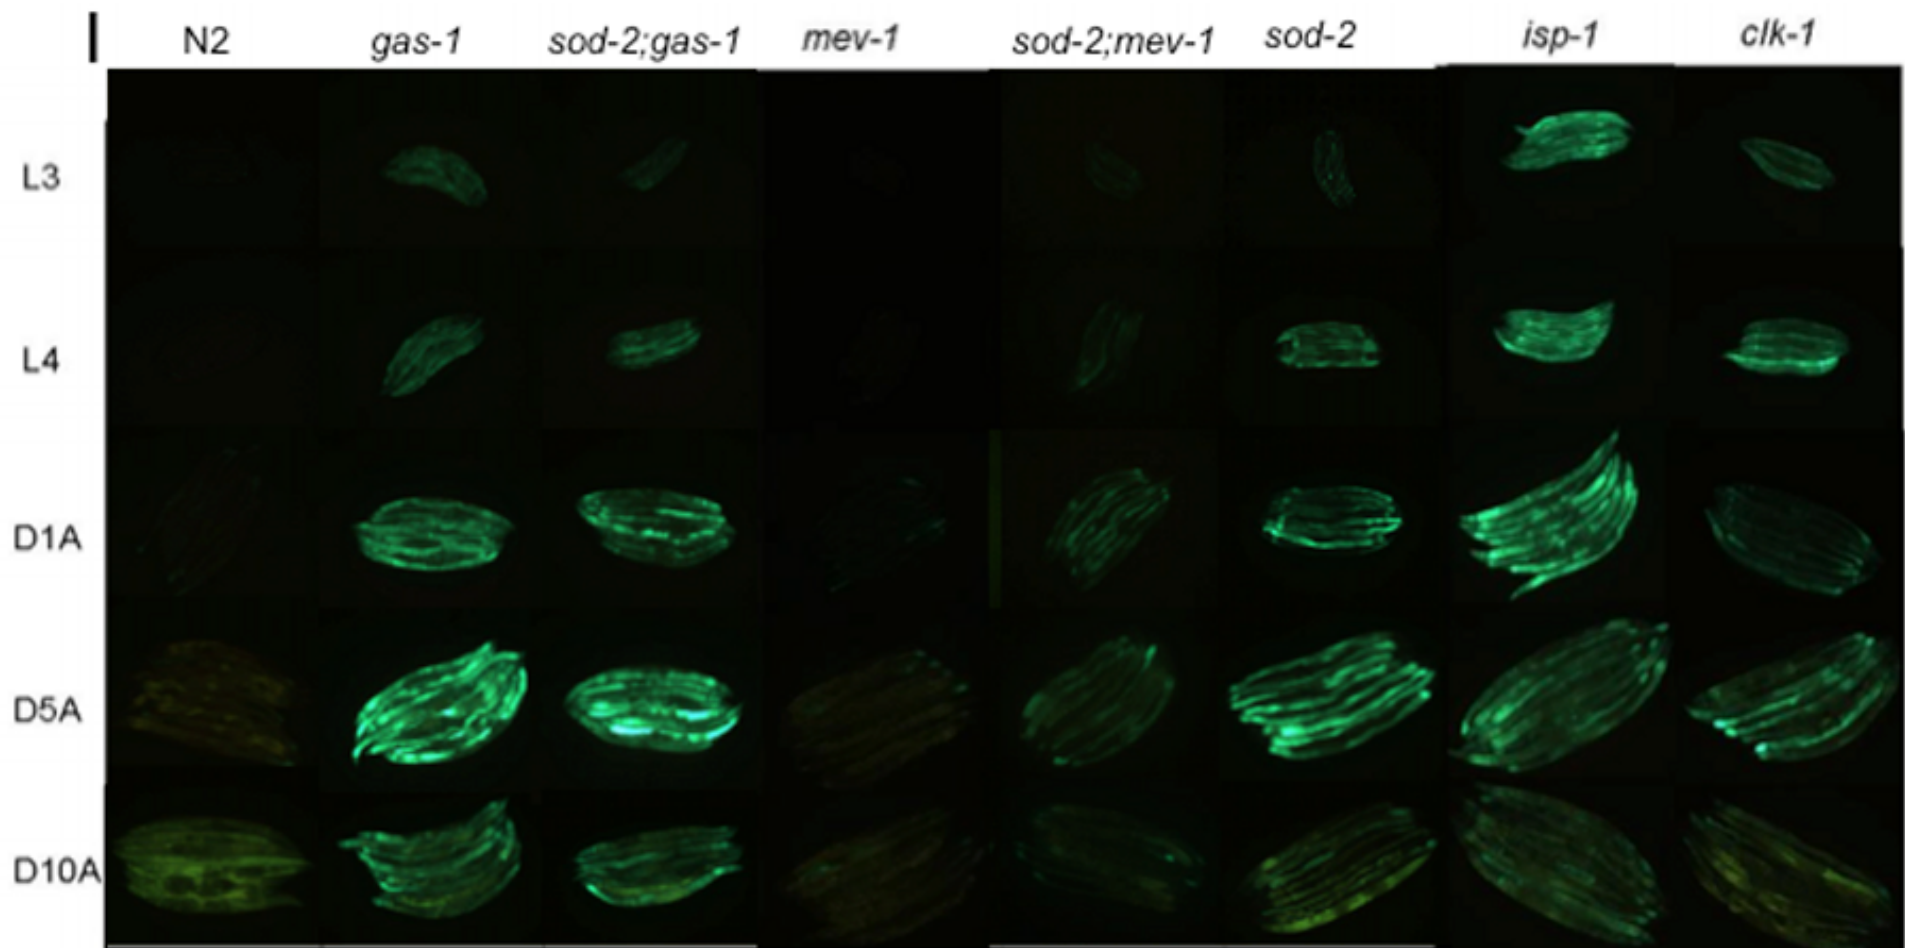

### Development on *hsp-6* RNAi

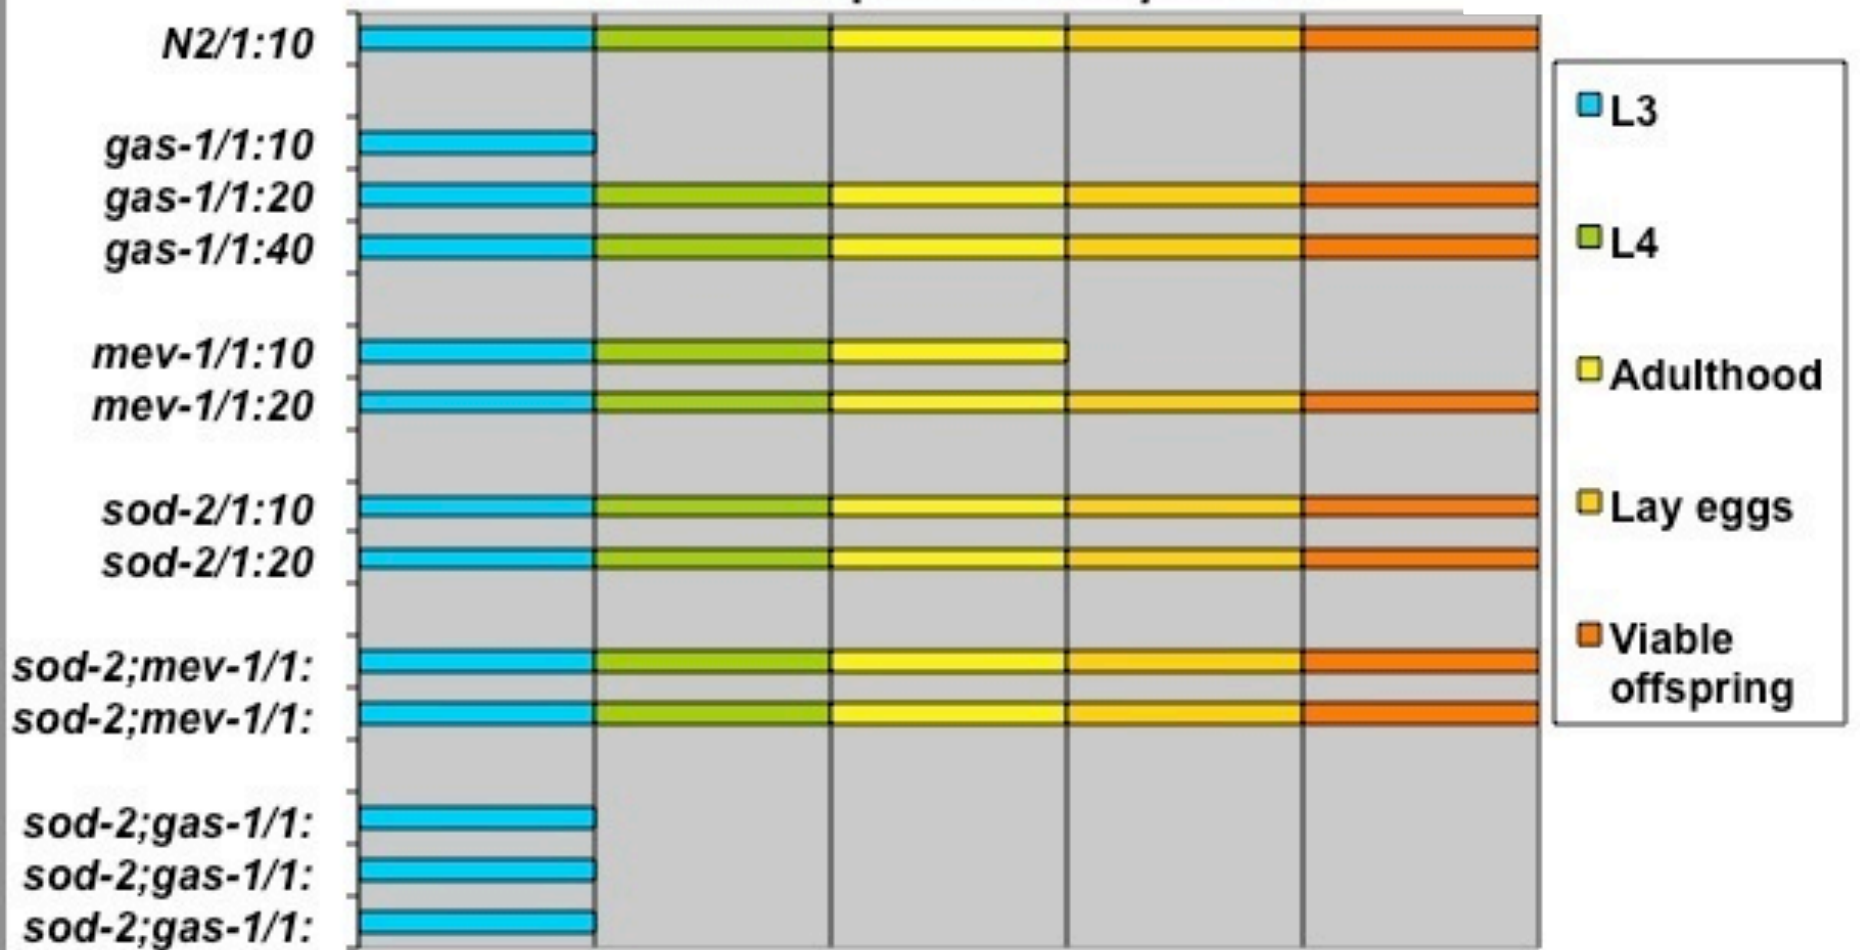

Supplement: NIHMS512071-supplement-Supp_Fig_S1-S5.pdf [file NIHMS512071-supplement-Supp_Fig_S1-S5.pdf]
